# Supplementary material
Source: publisher figshare collection journal article supplement (https://rs.figshare.com/ndownloader/files/40854547)
Supplement: Supplementary file 1 [file 40854547]

## Sheet: Figure2AB_S3A
species	community	period	mean_nb_males	nonac	M	most_sucessful_male
Bonobo	Ekalakala	2016-2019	3	-0.0266667	-0.0801509	0.6
Bonobo	Kokoalongo	2016-2019	9.25	0.26107	2.84234	0.625
Chimpanzee	Kasekela	1985-1991	11.375	0.0588036	0.966815	0.375
Chimpanzee	Kasekela	1986-1992	11.3333	0.0659658	1.15152	0.444444
Chimpanzee	Kasekela	1987-1993	11.3636	0.0364976	0.596063	0.363636
Chimpanzee	Kasekela	1988-1994	11.5	0.0493312	0.719908	0.4
Chimpanzee	Kasekela	1989-1995	11.6667	0.0208436	0.295676	0.333333
Chimpanzee	Kasekela	1990-1996	11.8	0.057808	0.854583	0.3
Chimpanzee	Kasekela	1991-1997	11.8	0.0855304	1.18857	0.4
Chimpanzee	Kasekela	1992-1998	11.8	0.0828507	1.15143	0.4
Chimpanzee	Kasekela	1993-1999	11.8182	0.126954	1.89513	0.454545
Chimpanzee	Kasekela	1994-2000	11.6154	0.110116	1.53446	0.384615
Chimpanzee	Kasekela	1995-2001	11.6154	0.103013	1.33394	0.384615
Chimpanzee	Kasekela	1996-2002	11.5833	0.132988	1.85436	0.416667
Chimpanzee	Kasekela	1997-2003	11.3571	0.0295103	0.434892	0.285714
Chimpanzee	Kasekela	1998-2004	11.2308	0.000416264	-0.00517829	0.230769
Chimpanzee	Kasekela	1999-2005	11.375	-0.0083606	-0.14353	0.1875
Chimpanzee	Kasekela	2000-2006	11.4	-0.0435248	-0.751515	0.133333
Chimpanzee	Kasekela	2001-2007	11.8571	-0.0266738	-0.439884	0.214286
Chimpanzee	Kasekela	2002-2008	12.1111	-0.0059184	-0.105016	0.222222
Chimpanzee	Kasekela	2003-2009	12.1111	-0.00370724	-0.0695415	0.166667
Chimpanzee	Kasekela	2004-2010	12.9	0.0228447	0.378348	0.25
Chimpanzee	Kasekela	2005-2011	13.1579	0.00217652	0.0287333	0.157895
Chimpanzee	Kasekela	2006-2012	13.6316	0.0174159	0.303774	0.157895
Chimpanzee	Kasekela	2007-2013	13.8235	0.0183758	0.319151	0.235294
Chimpanzee	Kasekela	2008-2014	13.2105	0.0122232	0.206211	0.210526
Chimpanzee	Kasekela	2009-2015	12.7647	0.035195	0.614777	0.176471
Chimpanzee	Kasekela	2010-2016	12.5556	0.0406686	0.751259	0.222222
Chimpanzee	Kasekela	2011-2017	11.6154	0.0537213	0.939231	0.307692
Chimpanzee	Mitumba	2004-2010	2.66667	-0.0303606	-0.18682	0.555556
Chimpanzee	Mitumba	2005-2011	3	-0.00951425	-0.155987	0.5
Chimpanzee	Mitumba	2006-2012	4.33333	0.249695	1.88874	0.833333
Chimpanzee	Mitumba	2007-2013	6	0.512453	4.00843	1

## Sheet: FigureS3B
species	community	period	mean_nb_males	most_successful_male
Bonobo	Ekalakala	2014-2019	3	0.666667
Bonobo	Kokoalongo	2014-2019	9.14286	0.454545
Chimpanzee	Kasekela	1985-1991	11.375	0.375
Chimpanzee	Kasekela	1986-1992	11.3333	0.444444
Chimpanzee	Kasekela	1987-1993	11.3636	0.363636
Chimpanzee	Kasekela	1988-1994	11.5	0.4
Chimpanzee	Kasekela	1989-1995	11.6667	0.333333
Chimpanzee	Kasekela	1990-1996	11.8	0.3
Chimpanzee	Kasekela	1991-1997	11.8	0.4
Chimpanzee	Kasekela	1992-1998	11.8	0.4
Chimpanzee	Kasekela	1993-1999	11.8182	0.454545
Chimpanzee	Kasekela	1994-2000	11.6154	0.384615
Chimpanzee	Kasekela	1995-2001	11.6154	0.384615
Chimpanzee	Kasekela	1996-2002	11.5833	0.416667
Chimpanzee	Kasekela	1997-2003	11.3571	0.285714
Chimpanzee	Kasekela	1998-2004	11.2308	0.230769
Chimpanzee	Kasekela	1999-2005	11.375	0.1875
Chimpanzee	Kasekela	2000-2006	11.4	0.133333
Chimpanzee	Kasekela	2001-2007	11.8571	0.214286
Chimpanzee	Kasekela	2002-2008	12.1111	0.222222
Chimpanzee	Kasekela	2003-2009	12.1111	0.166667
Chimpanzee	Kasekela	2004-2010	12.9	0.25
Chimpanzee	Kasekela	2005-2011	13.1579	0.157895
Chimpanzee	Kasekela	2006-2012	13.6316	0.157895
Chimpanzee	Kasekela	2007-2013	13.8235	0.235294
Chimpanzee	Kasekela	2008-2014	13.2105	0.210526
Chimpanzee	Kasekela	2009-2015	12.7647	0.176471
Chimpanzee	Kasekela	2010-2016	12.5556	0.222222
Chimpanzee	Kasekela	2011-2017	11.6154	0.307692
Chimpanzee	Mitumba	2004-2010	2.66667	0.555556
Chimpanzee	Mitumba	2005-2011	3	0.5
Chimpanzee	Mitumba	2006-2012	4.33333	0.833333
Chimpanzee	Mitumba	2007-2013	6	1
